# Supplementary material for: An HSV-2 based oncolytic virus can function as an attractant to guide migration of adoptively transferred T cells to tumor sites
Source: PubMed Central journal article supplement (PMC4359264; doi:10.18632/oncotarget.2817), 2014-11-25

# An HSV-2 based oncolytic virus can function as an attractant to guide migration of adoptively transferred T cells to tumor sites

## Supplementary Material

Supplementary figure 1. Tumor growth of individual animals from data shown in Figure 6B.

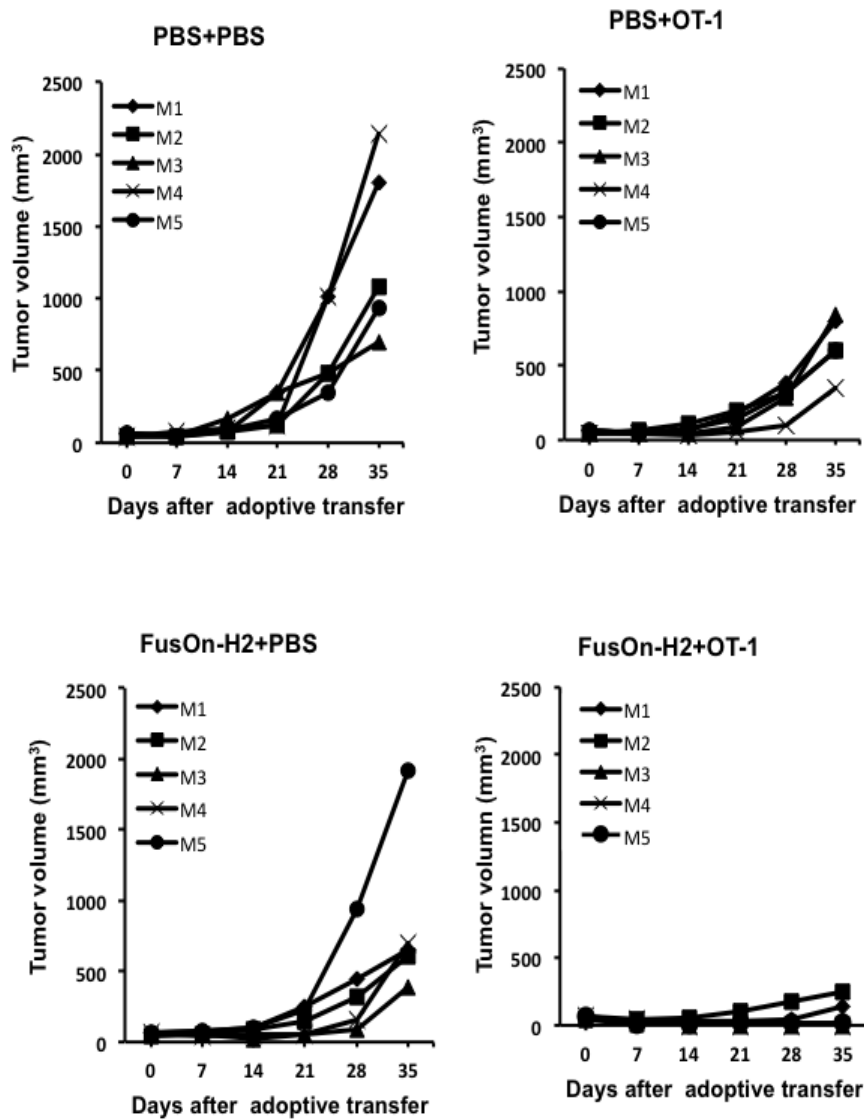

Supplement: oncotarget-06-902-s001.pdf [file oncotarget-06-902-s001.pdf]
